# Supplementary material
Source: PubMed Central journal article supplement (PMC5232893)
Supplement: mmc2.pdf [file mmc2.pdf]

# Measurement of Slow Spontaneous Release of 11-*cis*-Retinal from Rhodopsin

He Tian,<sup>1</sup> Thomas P. Sakmar,<sup>1,2,\*</sup> and Thomas Huber<sup>1,\*</sup>

<sup>1</sup>Laboratory of Chemical Biology and Signal Transduction, The Rockefeller University, New York, NY; and <sup>2</sup>Department of Neurobiology, Care Sciences and Society, Division of Neurogeriatrics, Center for Alzheimer Research, Karolinska Institutet, Huddinge, Sweden

**ABSTRACT** The vertebrate visual photoreceptor rhodopsin (Rho) is a unique G protein-coupled receptor as it utilizes a covalently tethered inverse agonist (11-*cis*-retinal) as the native ligand. Previously, electrophysiological studies showed that ligand binding of 11-*cis*-retinal in dark-adapted Rho was essentially irreversible with a half-life estimated to be 420 years, until after thermal isomerization to all-*trans*-retinal, which then slowly dissociates. This long lifetime of 11-*cis*-retinal binding was considered to be physiologically important for minimizing background signal (dark noise) of the visual system. However, in vitro biochemical studies on the thermal stability of Rho showed that Rho decays with a half-life on the order of days. In this study, we resolve the discrepancy by measuring the chromophore exchange rate of the bound 11-*cis*-retinal chromophore with free 9-*cis*-retinal from Rho in an in vitro phospholipid/detergent bicelle system. We conclude that the thermal decay of Rho primarily proceeds through spontaneous breaking of the covalent linkage between opsin and 11-*cis*-retinal, which was overlooked in the electrophysiological recording. We estimate that this slow spontaneous release of 11-*cis*-retinal from Rho should result in 10<sup>4</sup> to 10<sup>5</sup> free opsin molecules in a dark-adapted rod cell—a number that is three orders of magnitude higher than previously expected. We also discuss the physiological implications of these findings on the basal activity of opsins and the associated dark noise in the visual system.

## INTRODUCTION

The vertebrate visual system has two main classes of photoreceptor pigments: cone opsins for bright-light (photopic) vision, and rhodopsin (Rho) for dim-light (scotopic) vision. Cone photopigments and Rho are all G protein-coupled receptors (GPCRs) comprised of a heptahelical transmembrane apoprotein opsin and a chromophore, 11-*cis*-retinal (the bound chromophore is 6-*s-cis*-11-*cis*-retinylidene, 11CR). In the dark state, opsin and 11CR are covalently linked together through a protonated Schiff base (PSB) bond. Upon photoactivation, 11CR absorbs a photon to isomerize to all-*trans*-retinal (ATR, 6-*s-cis*-11-*trans*-retinylidene), triggering a series of conformational changes eventually culminating in the formation of the metarhodopsin II (Meta-II) state that is able to activate a heterotrimeric G protein (transducin) to allow downstream signaling. The decay of Meta-II is accompanied by the hydrolysis of the Schiff base and subsequent dissociation of ATR from its binding

pocket (1). A previous fluorescence study showed that the Meta-II species has a decay half-time of 2.3 min at 37°C (2).

11CR is an inverse agonist that minimizes the basal activity of photoreceptors. For cone receptors, 11CR has a finite binding lifetime, and the spontaneous breaking of the PSB bond has been reported (3). In contrast, 11CR binding to Rho has been considered essentially irreversible. The covalent linkage between 11CR and opsin ensures that the ligand-receptor complex has a long lifetime in the inactive state until it absorbs a photon. Electrophysiological studies have suggested that dark-adapted Rho decays as a result of the thermal isomerization of 11CR to ATR (4,5). These rare thermal events occur with a half-time of 420 years (5). This exceptional stability of dark-state Rho is thought to be a primary factor underlying the excellent photosensitivity of the rod system (6). In contrast, an in vivo radioactive labeling study on dark-adapted mouse retina showed that the rate of chromophore turnover in Rho was  $1.8 \times 10^{-7} \text{ s}^{-1}$ , or a half-life of 45 days (7). However, this value was derived from a single temperature, which makes comparison with other thermally activated processes difficult, and the experiments could not definitely distinguish between de novo pigment synthesis and chromophore exchange within the existing pigment. Moreover, all these in vivo data are at

Submitted September 13, 2016, and accepted for publication December 5, 2016.

\*Correspondence: sakmar@rockefeller.edu or hubert@rockefeller.edu

He Tian's present address is Department of Chemistry and Chemical Biology, Harvard University, Cambridge, MA.

Editor: Elsa Yan

<http://dx.doi.org/10.1016/j.bpj.2016.12.005>

© 2017 Biophysical Society.

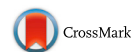

odds with the *in vitro* biochemical measurements, which found that the thermal decay rates of Rho at physiological temperature is on the order of  $10^{-6} \text{ s}^{-1}$  (8,9).

In our study, we revisited the stability of dark-state Rho by measuring the exchange rate of bound 11CR with free 9-*cis*-retinal (9CR) in Rho reconstituted into detergent/lipid bicelles. We found that the rate of the light-independent chromophore dissociation at 37°C was  $2.2 \times 10^{-7} \text{ s}^{-1}$ , corresponding to a half-time of 36 days. This dissociation rate and the activation energy are distinct from the earlier biochemical data that measured the denaturation rate of Rho and opsin *in vitro* (8–10), and from the electrophysiological studies that measured thermal activation of single Rho molecules in native disc membranes (4,5). We conclude that the direct breaking of the PSB bond gave rise to the observed chromophore release. Our data also suggested that the chromophore turnover rate obtained from the radioactive labeling study (7) was primarily attributable to spontaneous release of retinal from dark-state Rho molecules, rather than *de novo* protein synthesis. Thus both rod photoreceptors and cone receptors spontaneously release their chromophore at physiological temperature. We estimate the resulting number of free opsin molecules in a dark-adapted rod cell to be in the range of  $10^4$  to  $10^5$ , which is three orders of magnitude higher than previously thought. Finally, we discuss the physiological implications of our findings for rod cell signaling.

## MATERIALS AND METHODS

### Materials

1D4-Sepharose 2B was prepared from 1D4 mAb and cyanogen bromide-activated Sepharose 2B (2 mg IgG per mL packed beads). *n*-dodecyl- $\beta$ -D-maltoside (DM) and 3-((3-cholamidopropyl)dimethylammonio)-1-propanesulfonate (CHAPS) in the highest purity grade were obtained from Anatrace (Maumee, OH). 1-palmitoyl-2-oleoyl-*sn*-glycero-3-phosphocholine (POPC) was obtained from Avanti (Avanti Polar Lipids, Alabaster, AL). 9CR was obtained from Sigma (St. Louis, MO). 11-*cis*-retinal was a gift from Drs. P. Sorter and V. Toome at Hoffmann-La Roche. In this study, we utilized Rho and opsin purified from bovine rod outer segment (ROS). The detailed methods for preparing these samples are given in the [Supporting Material](#).

### The measurement of retinal binding kinetics based on quenching of Trp

Fluorescence spectroscopy was performed at 28°C on a SPEX Fluorolog tau-311 spectrofluorometer (Horiba, Edison, NJ) in photon-counting mode. The excitation wavelength was 295 nm with a 0.6-nm band-pass, and the emission was measured at with the monochromator set to 330 nm with a 15-nm band-pass and an additional Hoya UG-340 UV band-pass filter. The signal was sampled every 30 s with 2 s integration time. The excitation beam was closed between integrations to minimize photobleaching. The concentration of Rho purified in 0.1% DM micelles was typically 0.25–0.30  $\mu\text{M}$ . The time course experiments were done by adding aliquots of the elution samples from receptors (30  $\mu\text{L}$ ) to the POPC/CHAPS bicelle buffer A (1% (weight/volume) POPC, 1% (w/v)

CHAPS, 125 mM KCl, 25 mM MES, 25 mM HEPES, 12.5 mM KOH (pH 6.0), 450  $\mu\text{L}$ ) under constant stirring. The 11CR or 9CR ethanolic stock solution was diluted in the POPC/CHAPS bicelle buffer, and 20  $\mu\text{L}$  of this working dilution was added to the cuvette to give a desired final concentration (typically  $\sim 1.5$  to 2.0  $\mu\text{M}$ ). The sample was constantly stirred to facilitate mixing. For each measurement, the concentrations of freshly diluted retinoids were determined from their absorption maxima ( $\epsilon_{378 \text{ nm}} = 25,600 \text{ M}^{-1} \text{ s}^{-1}$  for 11CR and  $\epsilon_{374 \text{ nm}} = 36,200 \text{ M}^{-1} \text{ s}^{-1}$  for 9CR). The decrease of Trp fluorescence was fitted with a pseudo first-order exponential decay model to derive the apparent regeneration rate ( $k_{obs}$ ). The second-order rate constant ( $k_2$ ) for the binding between opsin and retinal was calculated as  $k_2 = k_{obs}/[\text{retinal}]$ .

## The chromophore exchange of ROS Rho

Lectin-affinity purified ROS Rho was exchanged by gel filtration into the POPC/CHAPS bicelle buffer B (1% (w/v) POPC, and 1% (w/v) CHAPS, 137.5 mM NaCl, 0.25 mM EDTA, 25 mM MES, 25 mM HEPES hemisodium salt (pH 6.0)). The samples (5.3  $\mu\text{M}$  Rho) were supplemented with the 9CR (49  $\mu\text{M}$ ) and incubated in the dark for  $10^6$ ,  $2 \times 10^6$ , and  $3 \times 10^6$  s (11.6, 23.2, and 34.8 days) at three different temperatures (28°C, 36°C, and 44°C). The samples were then purified using 1D4-sepharose resin and characterized by UV-Vis spectroscopy. The dark-state absorption spectra (dark spectra) of Rho samples supplemented with 50 mM hydroxylamine were recorded in a 50- $\mu\text{L}$  microcuvette with 10-mm path length on a Lambda-800 spectrophotometer (PerkinElmer Life Sciences, Waltham, MA). To acquire the absorption spectra of the photobleached Rho (light spectra), the sample was irradiated for 30 s with a 335-mW 505-nm LED light source (Thorlabs, Newton, NJ) placed on top of the cuvette. First, the dark and light spectra were corrected for baseline offsets by subtracting a constant to give zero absorbance at 650 nm. Second, the dark-light difference spectra were obtained by subtracting the offset-corrected dark and light spectra. Third, the difference spectra were normalized to  $-1$  absorbance units at 365 nm. Fourth, the double-difference spectra were obtained by subtracting the normalized difference spectra of the Rho-isoRho mixtures from the normalized difference spectrum of pure Rho. Last, the extent of chromophore exchange was calculated by ratio of the amplitude of the double-difference spectra of the exchanged sample with the amplitude of a double-difference spectrum obtained from pure isoRho and Rho. For more details of the chromophore exchange procedures see the [Supporting Material](#).

## RESULTS

### Rationale of using chromophore exchange to quantifying 11CR dissociation

Our aim in this study is to measure the spontaneous dissociation of 11CR from Rho, without previous activation by light or heat. A major challenge is how to quantify the fraction of newly formed free opsin resulting from 11CR dissociation. Since Rho and opsin share identical primary sequence and similar tertiary structures (11,12), no immunopurification method would separate them. Moreover, the ligand-binding pocket of opsin is enclosed by the heptahelical scaffold, making it impossible to develop a ligand-affinity chromatography method. In principle, Rho and opsin can be spectrophotometrically resolved, as opsin lacks the 500-nm absorption peak that is characteristic for Rho. However, the dissociation constant ( $K_d$ ) is so small that at equilibrium it is impossible to reliably quantify the amount of free opsin whose concentration must be orders of magnitude lower than that of Rho in

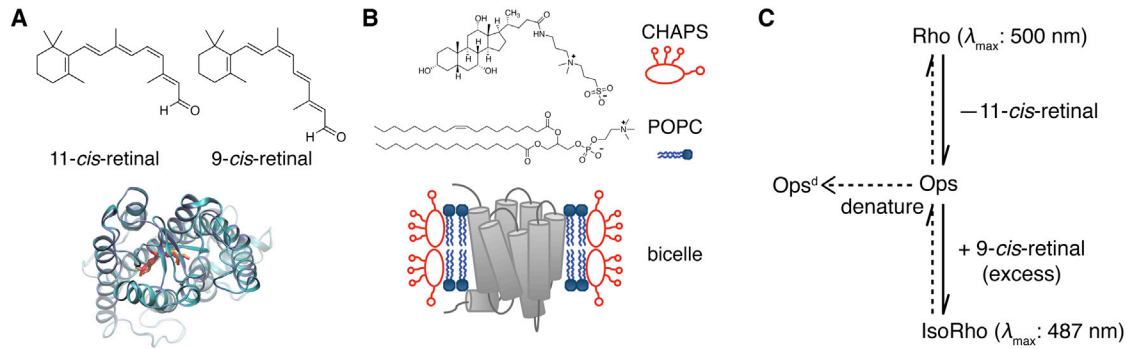

FIGURE 1 Scheme for measuring chromophore exchange in rhodopsin. (A) Superimposition of the structure of Rho (PDB: 1U19, cyan) (15) and isoRho (PDB: 2PED, ice blue) (16) shows 11-*cis*-retinal (11CR, orange) and 9-*cis*-retinal (9CR, red) occupy the same ligand binding pocket in opsin. Chemical isomer structures are shown above. (B) The structures of CHAPS and POPC and a cartoon of Rho reconstituted in a POPC/CHAPS bicelle are shown. (C) The spontaneous dissociation of 11CR from Rho forms opsin, which gets trapped by 9CR to form isoRho, or less likely, denatures irreversibly. To see this figure in color, go online.

equilibrium. Moreover, unliganded opsin is less thermally stable than rhodopsin and it has a propensity to denature and precipitate (13), further increasing the likelihood of underestimating the amount of opsin.

We propose to use the *in vitro* chromophore exchange rate of the bound 11CR with free 9CR to approximate the dissociation rate of 11CR (Fig. 1). Free opsin can also form a PSB linkage with 9CR to give a recombinant product termed isorhodopsin (isoRho). Compared with Rho, isoRho has its absorbance maximum shifted from 500 to 487 nm (14), thus providing an optical read-out. 11CR and 9CR occupy the same ligand-binding pocket (Fig. 1 A) (15,16). Therefore, dissociation of 11CR from the ligand-binding pocket is a prerequisite for subsequent 9CR binding. Similar to 11CR, 9CR enhances the thermal stability of the receptor, thereby preventing the loss of opsin following 11CR dissociation. We envision that incubating Rho with 9CR would drive forward the dissociation equilibrium of 11CR from Rho, resulting in

slow but appreciable conversion of Rho to isoRho, which can then be spectrophotometrically determined.

### Kinetics of retinal binding with opsin

An important question in this experimental scheme is whether 9CR would effectively compete with 11CR in binding to opsin. 11CR dissociation from Rho would produce free 11CR in the system. If the binding between 9CR and opsin is significantly slower than that between 11CR and opsin, then the reassociation of 11CR and opsin may not be negligible. We employed a fluorescence resonance energy transfer (FRET)-based assay to measure the binding kinetics of 11CR and 9CR with opsin (Fig. 2). The dark-state Rho exhibits a distinct 500-nm absorption peak due to the PSB linkage between opsin and 11CR, as well as a less-intense 350-nm peak. In dark-state Rho, energy transfer between Trp residues and 11CR results in ~80% quenching of

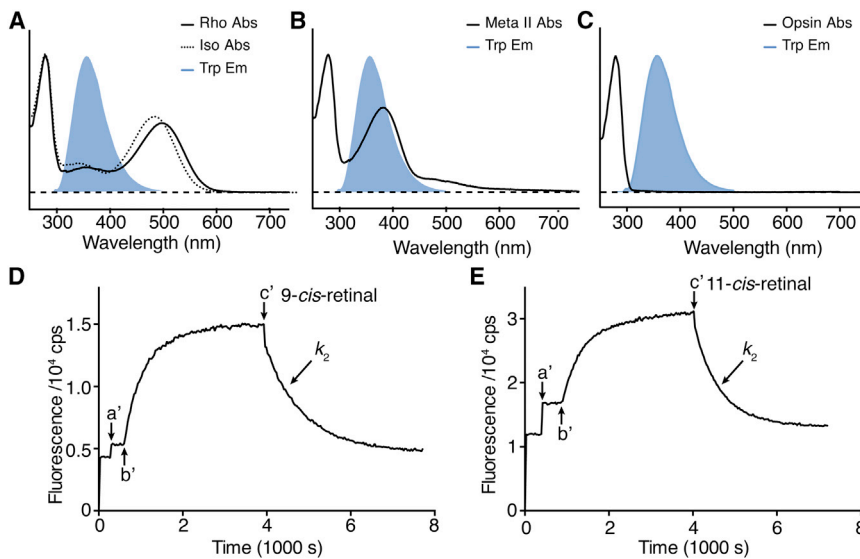

FIGURE 2 Measurement of the binding kinetics between opsin and retinals. The absorption spectra of Rho and isoRho (A), Meta-II state (B), and opsin (C) are overlaid with the fluorescence emission peaks of Trp (blue, maximum at 330 nm). The spectra are normalized to the intensities of the absorption and fluorescence emission peaks. (D and E) Tryptophan fluorescence time course traces are presented. The dark-state pigment was added into the assay buffer at arrow  $a'$ . The sample was then photobleached at arrow  $b'$  to form the Meta-II state. After Meta-II decay was close to completion at arrow  $c'$ , ligand 11CR was added to initiate pigment regeneration. The binding between opsin and 9CR ( $k_2 = (0.67 \pm 0.03) \times 10^3 \text{ M}^{-1} \text{ s}^{-1}$ ) was slightly slower than that between opsin and 11CR ( $k_2 = (1.08 \pm 0.04) \times 10^3 \text{ M}^{-1} \text{ s}^{-1}$ ). To see this figure in color, go online.

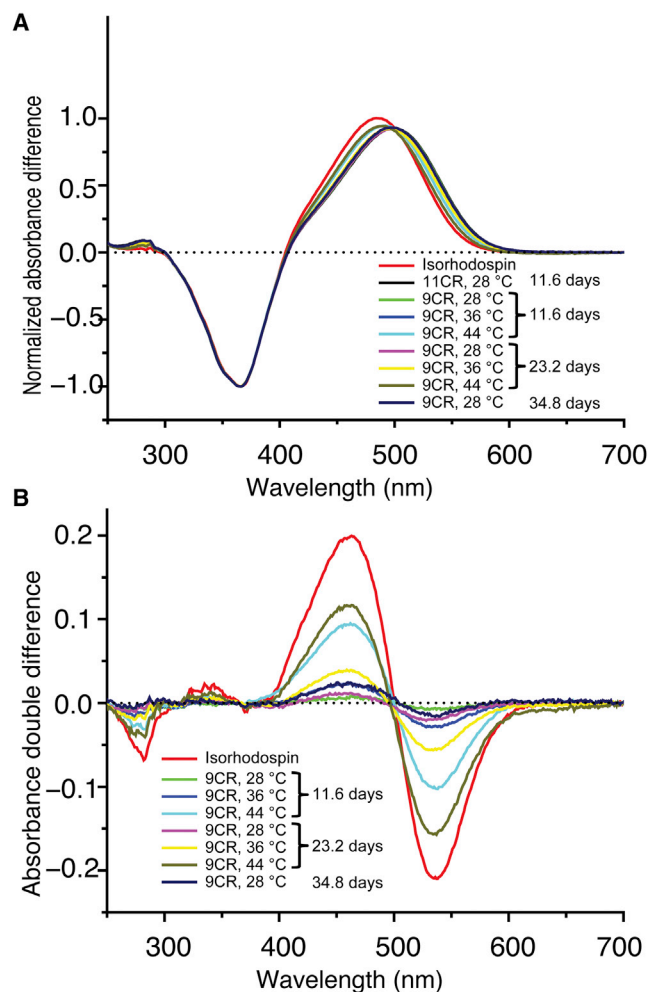

**FIGURE 3** Spectrophotometric analysis of the slow chromophore exchange in ROS Rho. Purified Rho ( $5.3 \mu\text{M}$ ) in POPC/CHAPS bicelle buffer B was supplemented with 9CR ( $49 \mu\text{M}$ ) and incubated at different temperatures ( $28^\circ\text{C}$ ,  $36^\circ\text{C}$ , and  $44^\circ\text{C}$ ). Aliquots were taken at three different time points ( $10^6$  s or 11.6 days,  $2 \times 10^6$  s or 23.2 days, and  $3 \times 10^6$  s or 34.8 days) and repurified to remove excess retinal. The formation of isoRho was quantified by UV-Vis spectroscopy. (A) The normalized difference absorption spectra were obtained by subtracting the drift-corrected spectra of the photobleached Rho-isoRho mixtures from the spectra of the dark-state samples in presence of hydroxylamine and normalizing to  $-1$  at  $365 \text{ nm}$ . (B) The double-difference spectra (subtracting the difference spectra of Rho-isoRho mixtures from the difference spectrum of pure Rho) reveal the decrease in the  $500\text{-nm}$  absorbance of Rho and increase in the  $487\text{-nm}$  absorbance of isoRho. The extent of chromophore exchange was calculated from the decrease of  $500\text{-nm}$  absorbance in the double-difference spectra.

the Trp fluorescence (Fig. 2 A) (2). Photoisomerization of 11CR to ATR converts the inactive Rho to the active Meta-II species with a deprotonated Schiff base, and the retinal absorption peak correspondingly shifts from  $500$  to  $380 \text{ nm}$ . At the Meta-II state, the spectral overlap of the Trp emission and retinal absorption spectrum is greater, leading to even higher quenching efficiency as compared with the dark state (Fig. 2 B) (2). When ATR is released from the binding pocket, there is essentially no spectral

overlap of the absorption spectrum of opsin apoprotein and the Trp emission spectrum, and the energy transfer between retinal and the Trp residues of opsin is completely lost (Fig. 2 C). Therefore, the energy transfer between retinal and the Trp residues in opsin can be utilized as a reporter for retinal entry or release from the ligand-binding site (2).

We reconstituted immunopurified Rho into a POPC/CHAPS bicelle system. The long-chain phospholipid POPC forms small lipid bilayer fragments, which are edge-stabilized by the detergent CHAPS to promote dispersion in the aqueous phase. Similar to nanodiscs or nanoscale apolipoprotein-bound bilayers (NABBs) (17), bicelles provide a planar lipid environment for membrane proteins.

We photobleached the samples and observed a monoexponential increase of Trp fluorescence corresponding to Meta-II decay. After the Meta-II photoproduct decayed to completion, we added exogenous 11CR or 9CR to the photobleached Rho (Fig. 2, D and E). We found that the addition of 9CR or 11CR initiated a robust monoexponential decrease in the Trp fluorescence signals, indicating the formation of the binding product between retinals and opsin. The binding rates of opsin with 9CR and 11CR at  $28^\circ\text{C}$  were determined to be  $(0.67 \pm 0.03) \times 10^3 \text{ M}^{-1} \text{ s}^{-1}$  and  $(1.08 \pm 0.04) \times 10^3 \text{ M}^{-1} \text{ s}^{-1}$ , respectively.

Because the binding between opsin and 9CR was only modestly slower than that between opsin and 11CR, when 9CR is supplied in excess of Rho, the small fraction of 11CR released from Rho would not efficiently compete with 9CR for the newly formed opsin. The conversion of the newly formed opsin to isoRho will be essentially complete. Therefore, the concentration of isoRho should closely approximate the extent of 11CR dissociation.

### Spectrophotometric analysis of chromophore exchange in Rho

We incubated purified Rho with excess 9CR (the initial molar ratio of 9CR to Rho was 9.2 to 1) at three different temperatures ( $28^\circ\text{C}$ ,  $36^\circ\text{C}$ , and  $44^\circ\text{C}$ ). The slow dissociation rate necessitated very long reaction times (up to  $3 \times 10^6$  s, 34.8 days) to reliably quantify the chromophore exchange. At the conclusion of the incubation, the samples were immunopurified to remove free retinal and analyzed by ultraviolet-visible (UV-Vis) spectroscopy (Fig. 3). The difference spectra between the dark and the light (photobleached) state correspond to the combined contribution of 11CR and 9CR bound to opsin. As the incubation with 9CR prolonged, the maxima of the difference absorption spectra steadily shifted from  $500$  to  $487 \text{ nm}$ , indicating the conversion of the 11CR-bound Rho to 9CR-bound isoRho (Fig. 3 A). We further subtracted the difference spectra of the Rho-isoRho mixtures from the difference spectrum of pure Rho. The decrease in the  $500\text{-nm}$  absorbance was used to calculate the fraction of 11CR dissociation (Fig. 3 B).



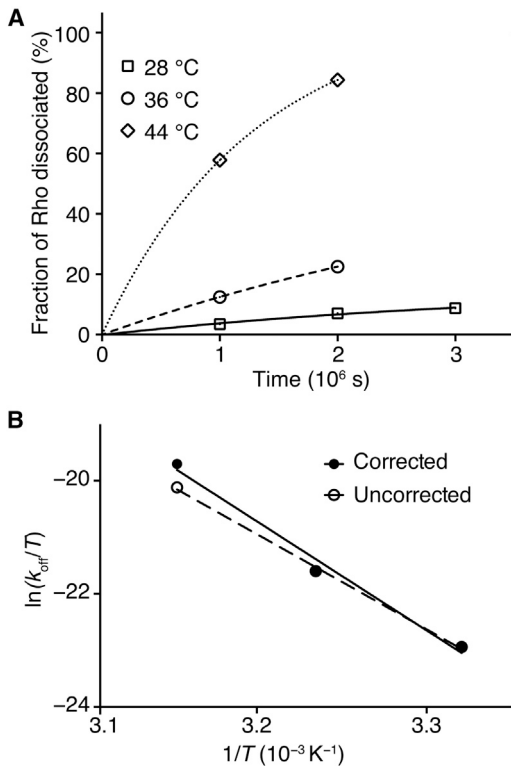

FIGURE 4 Analysis of the chromophore exchange rates. (A) Derivation of the dissociation rate constant ( $k_{off}$ ): the fraction of Rho dissociation in the chromophore exchange measurement was plotted versus the incubation time at 28°C (square), 36°C (circle), and 44°C (diamond, corrected for the denaturation of opsin) and fitted using a monoexponential model. (B) Eyring plot for the chromophore dissociation kinetics is shown. The exchange rate at 44°C was corrected for contribution of opsin denaturation as described in the [Supporting Material](#). The activation enthalpies derived from the corrected data (solid line) and the uncorrected data (dash line) are  $38.5 \pm 4.4$  kcal mol<sup>-1</sup> and  $33.5 \pm 1.4$  kcal mol<sup>-1</sup>, respectively.

We derived the dissociation rate constant ( $k_{off}$ ) by assuming that 11CR dissociation from Rho followed a monoexponential model (Fig. 4 A). We found that the POPC/CHAPS bicelle system effectively stabilized opsin over the long incubation time, as loss of denatured opsin was observed only at 44°C, whose effect was corrected as described in the [Supporting Material](#). The dissociation rate ( $k_{off}$ ) at 37°C was calculated to be  $2.2 \times 10^{-7}$  s<sup>-1</sup>. We performed Eyring analysis (Fig. 4 B) to derive the activation enthalpy ( $38.4 \pm 4.4$  kcal mol<sup>-1</sup>).

## DISCUSSION

### Advantages of using POPC/CHAPS bicelles for receptor reconstitution

Our aim was to characterize the chromophore exchange in Rho in a homogeneous, chemically defined system. Here we utilized the POPC/CHAPS bicelle system to reconstitute Rho. Various bicelle systems have been shown to retain the

structural and functional integrity of membrane proteins (18). Previously, we have shown that the binding product between 11CR and photobleached Alexa488-labeled Rho in the bicelle system could be repeatedly photoactivated, demonstrating the regeneration of mature pigment (19). In our study, we used Trp fluorescence to show that the photobleached Rho in bicelles bind with 11CR or 9CR with comparable kinetic rate constants.

The attempt at direct characterization of the chromophore exchange in the native ROS disc membrane has significant technical challenges. The ROS disc membranes have a heterogeneous structure containing Rho, residual retinoids, and other integral and periphery membrane proteins. Notably, the ROS membranes contain phosphatidylethanolamine that have a chance to react with retinals through Schiff-base chemistry (20). The nonspecific binding between retinal and other components in the ROS membrane, as well as the binding between retinal and lipids, might affect the measurements in a nontrivial way. Also, the ROS membranes contain a high level of polyunsaturated lipids that are highly susceptible to oxidative damage. Experiments under an inert argon atmosphere and in presence of antioxidants are possible for short experiments, but not on a timescale of weeks required for the chromophore exchange experiment.

### The spontaneous dissociation of 11CR from Rho

A key finding in this study is that the spontaneous PSB bond breaking and dissociation of 11CR occurs at an appreciable rate under the physiological temperatures ( $k_{off}$  of  $2.2 \times 10^{-7}$  s<sup>-1</sup> or  $t_{1/2} = 36$  days at 37°C). This slow in vitro exchange rate in bicelles is consistent with the earlier observation that incubating salamander red rods with 9CR for 5 h did not produce any spectral shift detectable by microspectrophotometry (3). Our in vitro data showed a dissociation rate constant that is slightly larger than the in vivo chromophore exchange rate measured by radioactive labeling study on dark-adapted retinas in living mice kept in the dark ( $1.8 \times 10^{-7}$  s<sup>-1</sup> at 37°C) (7). This ~20% discrepancy could have resulted from the increased water accessibility in the bicelles as compared with native membranes of ROS, a subtle structural difference of murine versus bovine rhodopsin, or merely experimental variation. The comparison of the in vivo and in vitro exchange rates suggests that our value is likely to have the correct order of magnitude, and that the POPC/CHAPS bicelle system is a good approximation of native membranes for biochemical studies. An advantage of our in vitro measurement, however, is that we could investigate the temperature-dependence of the chromophore release rate.

Chromophore exchange of 11CR by 9CR has been demonstrated for cone pigments (21–23). The exchange in gecko cone pigment P521 reconstituted in digitonin was shown to be ~30% in 15 h at 15°C, corresponding to a  $k_{off}$  of  $6.6 \times 10^{-6}$  s<sup>-1</sup> (22). Our measured dissociation kinetics,

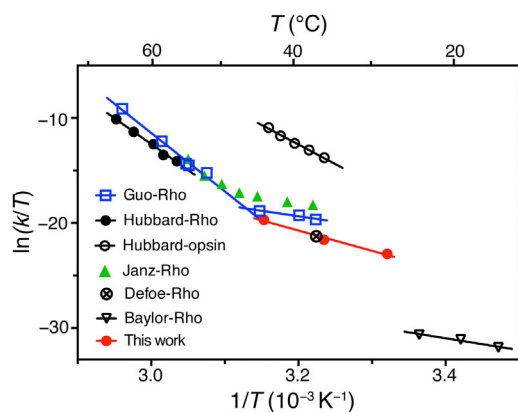

FIGURE 5 Comparison of the Eyring plots for the chromophore exchange reaction with thermal decay rates of Rho or opsin, and with spontaneous isomerization and activation of rhodopsin: (empty blue square) the thermal decay of Rho in 0.1% DM (9); (solid black circle) Rho in 2% digitonin (10); (empty black circle) opsin in 2% digitonin (10); (solid green triangle) Rho in 0.05% DM (8); (crossed empty circle) chromophore exchange of Rho in mouse retina measured by radioactive tracers in vivo (7); (inverted empty triangle) spontaneous isomerization and activation of Rho in toad retina measured electrophysiological recording (4); and (red solid circle) Rho chromophore release and exchange with 9CR in 1% POPC/CHAPS bicelles from our study. The *in vivo* chromophore exchange rate closely matches that observed in our study. Chromophore release is more than three orders of magnitude faster than spontaneous isomerization, suggesting that breaking of the covalent protonated Schiff base (PBS) rather than thermal isomerization is the mechanism underlying the measured chromophore exchange process. The activation enthalpies and entropies of the linear fittings are shown in Table S2. To see this figure in color, go online.

when extrapolated to 15°C, gives a  $k_{off}$  of  $1.5 \times 10^{-9} \text{ s}^{-1}$ . Thus the dissociation of chromophore from the gecko cone pigment is 4400-fold faster than that in rod pigment. Rod pigment has an enclosed ligand binding pocket, whereas ligand binding pockets of cone pigments are inferred to be much more accessible to solvents. Our data suggest that the difference between rod and cone pigments is not entirely clear-cut; the ligand-binding pocket of rod pigment could be more labile than previously thought.

### The chromophore dissociation pathways of Rho

Our measured dissociation rate theoretically could include the contributions of two pathways: 1) direct bond breaking between 11CR and opsin, followed by the release of 11CR from the ligand binding pocket; and 2) thermal isomerization of 11CR to ATR, followed by the release of ATR. The second pathway involves the formation of the active opsin-ATR complex (Meta-II Rho). In the literature, these two pathways are often collectively referred to as the “thermal decay” of Rho. The question here is how much each pathway contributed to the chromophore dissociation measured in our study.

Previously, the thermal decay of Rho has been quantified by heating Rho samples in native disc membranes (10,24) or reconstituted in detergent micelles (8–10,24) (Figs. 5

and S1; Table S2). Janz and Farrens (8) and Guo et al. (9) described the measurement of the thermal decay of Rho in DM micelles using the decrease of the 500-nm peak as the read-out. We noticed that Janz and Farrens performed their measurement at 1-min interval over a time course of hours (8). By comparison, Guo et al. derived the decay rates from fewer time points (9). To obtain the absorption spectrum, a small fraction of dark-state Rho was necessarily photobleached. It is possible that the higher thermal decay rates in the Janz and Farrens study could be an overestimation due to the accumulated photobleaching effect.

Both Janz and Farrens (8) and Guo et al. (9) reported that the thermal decay of Rho in DM micelles exhibited a concave slope in the Eyring plot. Guo et al. found that at high temperatures ( $\sim 52.0^\circ\text{C}$  to  $64.6^\circ\text{C}$ ), the activation enthalpy ( $\Delta^\ddagger H = 110 \pm 7 \text{ kcal mol}^{-1}$ ) and entropy ( $\Delta^\ddagger S = 261 \pm 15 \text{ cal mol}^{-1}\text{K}^{-1}$ ) were unusually large (9), which was consistent with the data for rhodopsin denaturation obtained by Hubbard (10). This very high activation enthalpy was attributed to the breaking of a hydrogen bond network and subsequent denaturation of Rho (9). In the lower temperature regime ( $\sim 37.1^\circ\text{C}$  to  $44.6^\circ\text{C}$ ), which is comparable with the conditions investigated in our study ( $\sim 28.0^\circ\text{C}$  to  $44.0^\circ\text{C}$ ), the activation enthalpy for the thermal decay of Rho dropped to  $20.6 \pm 4.5 \text{ kcal mol}^{-1}$  (9). Here we determined the activation energy for 11CR dissociation to be  $38.5 \pm 4.4 \text{ kcal mol}^{-1}$ . Moreover, our dissociation rate ( $\sim 10^{-7} \text{ s}^{-1}$ ) is one order of magnitude slower than the thermal decay rate ( $\sim 10^{-6} \text{ s}^{-1}$ ) obtained by Janz and Farrens, or Guo et al.

Our experimental scheme differs from those earlier studies (8–10) in two important ways. First, we chose to use membrane bilayer-mimic detergent/lipid bicelles to reconstitute Rho, whereas Janz and Farrens, and Guo et al. performed the measurements in 0.05% or 0.1% (w/v) DM micelles, respectively. It is known that substituting lipids for detergents reduced the thermal stability of Rho and opsin (10,24). Hubbard measured the thermal decay rate in 2% digitonin, which has been shown more effective than DM in stabilizing opsin (13). It is worth noting that in the Hubbard study petroleum ether was used to extract the lipids from ROS membranes. If the extraction were incomplete, the measurement would be inadvertently performed in a mixed detergent/lipid system. Second, the presence of excess 9CR further stabilizes the apoprotein by forming isoRho. In our study we only observed a moderate degree of opsin denaturation in the chromophore exchange experiment at  $44^\circ\text{C}$  and corrected for this effect. Compared with heating rod pigment in solution, our chromophore exchange scheme should include less contribution from opsin denaturation.

We did not attempt to quantify the amount of ATR, if any, in our system. The excess of 9CR to Rho imposed a technical challenge for quantifying the presence of ATR. More

importantly, Hubbard showed that thermally denatured Rho released 11CR, which, however, quickly isomerized to all-*trans* configuration; even the presence of denatured opsin made 11CR sterically labile and prone to isomerization (10). Therefore, even if the concentration of ATR in our system could be reliably measured, it would be difficult to determine, in such an in vitro biochemical experiment, whether *cis-trans* isomerization of retinal occurred inside the ligand binding pocket or only after dissociation from the apoprotein.

Meanwhile, the electrophysiological recording may provide a clue for the isomerization rate of 11CR inside the binding pocket. Baylor et al. found that rod cells in dark-adapted retina underwent spontaneous activation events similar to the single photon effect on the rods. Because the retina was not illuminated by any photon, the electrophysiologically detectable activation of single Rho molecules was mostly likely to arise from the thermal isomerization of 11CR to ATR inside the ligand-binding pocket that then produced active Meta-II molecules. The thermal activation rate of Rho in the native disc membrane was on the order of  $10^{-11} \text{ s}^{-1}$  (4,5), with an activation energy of  $22 \text{ kcal mol}^{-1}$  (4). Comparison of the electrophysiological data and our data suggests that the first pathway, i.e., direct 11CR dissociation, is three orders of magnitude faster than the second pathway involving the thermal isomerization of bound 11CR.

Based on these kinetic and thermodynamic measurements, the thermal decay process of Rho examined here consists of one predominant pathway, that is, the breaking of the PSB linkage between retinal and opsin. By contrast, those earlier reports (8–10) measured a mixed process compounded by the denaturation of protein. At low temperature ( $<45^\circ\text{C}$ ), direct PSB breaking is faster than the thermal denaturation of Rho. At high temperature ( $>45^\circ\text{C}$ ), Rho denaturation becomes the dominant mechanism leading to subsequent retinal release.

### Estimating the level of free opsin in rod cells from the chromophore dissociation rate

Is it possible to determine how many ligand-free opsin molecules exist in a rod cell? The psychophysical data on dark adaptation shows that at low bleaching levels, the exponential component of Rho regeneration in human retina has a  $k_{reg}$  of  $0.09 \text{ min}^{-1}$ , or  $1.5 \times 10^{-3} \text{ s}^{-1}$  (25). This pseudo first-order rate for Rho regeneration is determined by the second-order reaction rate for the recombination between 11CR and opsin ( $k_2$ ) and the concentration of free 11CR in the ROS. Assuming the concentration of available 11CR in the exponential phase of regeneration is the same as in the dark-adapted retina we obtain the following:

$$k_{reg} = k_2[11\text{CR}]_{dark}. \quad (1)$$

In the equilibrium of the dark-adapted retina, the rate of the dissociation of 11CR from Rho is equal to that of the formation of new Rho molecules, thus we have the following:

$$k_2[11\text{CR}]_{dark}[\text{opsin}] = k_{off}[\text{Rho}]. \quad (2)$$

Together with Eq. 1 we can eliminate the need to determine the concentration of free 11CR and obtain the following relations:

$$k_{reg}[\text{opsin}] = k_{off}[\text{Rho}], \quad (3)$$

$$[\text{opsin}] = (k_{off}/k_{reg})[\text{Rho}]. \quad (4)$$

Therefore, the opsin-to-Rho ratio is  $1.5 \times 10^{-4}$  in dark-adapted rod cells. The concentration of rhodopsin in rods was reported to be  $4.6 \text{ mM}$  (26), and we estimate the concentration of free opsin as  $0.67 \text{ }\mu\text{M}$ . The numbers of Rho molecules in a single monkey rod and toad rod are  $1.2 \times 10^8$  and  $2.7 \times 10^9$ , respectively (4,5), which corresponds to a range of  $10^4$  to  $10^5$  free opsin molecules per rod cell. Since human rods are comparable in size with monkey rods, we estimate the number of free opsin molecules in one typical human rod cell to be  $\sim 18,000$ .

### The physiological implications of free opsin in rod cell signaling

The dark noise of a single rod cell consists of two components: the discrete photon-like events characterized by low frequency and high amplitude; and the continuous fluctuations with high frequency and low amplitude (4,5,27). The discrete component ( $E_a = 22 \text{ kcal mol}^{-1}$ ) was attributed to the thermal isomerization of the bound 11CR to ATR ( $E_a = 24.5 \text{ kcal mol}^{-1}$ ) (28) based on their similar activation energies. Thermal activation of Rho, like photoactivation, proceeds through the Meta-II pathway to generate fully activated receptor, which would eventually translate into a decreased cGMP level and the hyperpolarization of the rod cell. The continuous noise was thought to reflect the shot effect of weaker events like the spontaneous activities of downstream signaling molecules occurring at a much higher frequency. In salamander rods, the continuous component was shown to be independent of G protein (29). The discrete component corresponding to the thermal isomerization events is thought to set the rod visual threshold (30).

The obvious question related to our biochemical determinations is whether the free opsin makes any contribution to the dark noise. In contrast to the opsin formed during Meta-II decay following the photoactivation or thermal activation of Rho, the free opsin resulting from spontaneous PSB breaking should not be phosphorylated nor arrestin-bound. Opsin exhibits a low level ( $\sim 10^{-6}$  relative to fully activated Meta-II Rho, Table 1) of basal activity (31,32). The total

**TABLE 1** Light-Independent Pathways for Rod Photoreceptor Activation

| Receptor                         | Free Opsin               | Opsin-ATR Noncovalent Complex | Opsin-11CR Noncovalent Complex       | Meta-II (Thermally Activated)                |
|----------------------------------|--------------------------|-------------------------------|--------------------------------------|----------------------------------------------|
| Number/rod <sup>a</sup>          | $\sim 10^4$ to $10^{5b}$ | — <sup>c</sup>                | $\sim 10$ to $10^2$ s <sup>-1d</sup> | $\sim 10^{-2}$ to $10^{-1}$ s <sup>-1e</sup> |
| Relative activity                | $10^{-6f}$               | $\sim 0.03$ to $0.14g$        | — <sup>h</sup>                       | 1                                            |
| Predicted response to extra 11CR | decrease                 | decrease                      | transiently increase <sup>i</sup>    | unchanged                                    |
| Predicted response to extra ATR  | decrease                 | increase                      | decrease                             | unchanged                                    |

<sup>a</sup>One rod cell contains  $\sim 10^8$  to  $10^9$  molecules of Rho, depending on the species (26).

<sup>b</sup>Calculated from Eqs. 1 to 4.

<sup>c</sup>The value is dependent on the concentration of ATR in dark-adapted retina, which was estimated to be less than 5% of 11CR (39).

<sup>d</sup>Calculated based on the  $k_{off}$  ( $2.2 \times 10^{-7}$  s<sup>-1</sup> at 37°C) and the total number of Rho ( $\sim 10^8$  to  $10^9$ ). At the equilibrium state, the rate of 11CR binding is equal to the dissociation rate. The activity of this noncovalent complex is transient and only detected by electrophysiological recording.

<sup>e</sup>Estimated based on the discrete dark noise, using a  $k_{off}$  of  $5.2 \times 10^{-11}$  s<sup>-1</sup> in monkey retina (5).

<sup>f</sup>Estimated by measuring phosphodiesterase (31) and transducin (32) activation.

<sup>g</sup>Measured by transducin activity assay (35,36).

<sup>h</sup>Although the opsin-11CR noncovalent complex cannot be purified and characterized because of its transient nature, the electrophysiological data showed substantial signaling by the complex (37).

<sup>i</sup>Upon addition of 11CR, the number of the opsin-11CR noncovalent complexes will transiently increase and then relax to the original level.

number of opsin ( $\sim 10^4$  to  $10^5$ ) correspond to  $\sim 0.01$  to  $0.1$  Meta-II Rho per rod cell per second. This value is well below the background light required for background adaptation of mammalian rods (equivalent to  $\sim 30$  to  $50$  Meta-II Rho per rod cell per second) (33). Moreover, if signaling of free opsin, like the continuous noise, exhibits high frequency and low amplitude, it may be filtered by the nonlinearity of rod-to-rod bipolar synapses (30). In earlier studies, exogenous supply of 11CR to dark-adapted rod cells failed to enhance rod sensitivity, suggesting that the small population of free opsin indeed does not cause elevated threshold (3).

On the other hand, opsin is exposed to the retinoids present in the ROS membrane, many of which are agonists for opsin, with ATR as the most potent one (34). The activity of ATR/opsin noncovalent complex ( $\sim 0.03$  to  $0.14$  of Meta-II) is five orders of magnitude higher than that of free opsin (35,36). The concentration of ATR/opsin complex has not been determined, but is dependent on the availability of ATR in ROS disc membrane. Moreover, an electrophysiological study showed that the binding between opsin and 11CR first transiently activates the rod receptor and then deactivates it (37). The formation of transiently active 11CR/opsin noncovalent complex occurs at a frequency of  $\sim 10$  to  $100$  s<sup>-1</sup> based on our estimates of the steady-state opsin regeneration rates in the dark-adapted rod cells. The potential roles of retinal/opsin complexes with respect to dark noise have not been assessed.

Ensemble measurements cannot shed light on the activity of opsin/retinal complex at the single-molecule level. The conformational ensemble of GPCRs with low apparent activities actually are comprised mostly of single molecules at inactive conformational states, and a small subpopulation at the active states that may activate G protein (38). Because a photon-like signaling event in rod cells involves activation of tens to hundreds of transducin

molecules within less than  $0.1$  s (6), the lifetimes of opsin-retinal complex at the active state would be a major factor for determining whether such a photo-like event is possible. We contend that electrophysiological recording should be employed to examine whether a fraction of opsin-retinal complex can reach the fully active conformation to produce the discrete photon-like noise and potentially cause an elevated scotopic threshold. The relatively high activity of ATR/opsin noncovalent complex implies that the mechanism to deplete ATR from the disc membrane may be important for suppressing rod noise.

## CONCLUSION

We utilized a chromophore exchange assay to show that 11CR slowly dissociates from the ligand-binding pocket of dark-adapted Rho with a  $k_{off}$  of  $2.2 \times 10^{-7}$  s<sup>-1</sup> at 37°C. Our analysis found that the spontaneous hydrolysis of PSB bond is three orders of magnitude faster than the thermal isomerization of 11CR, thus constituting the major decay pathway of dark-state Rho. This slow dissociation of 11CR from Rho suggests the presence of a population of free opsin and constant turnover of Rho molecules in dark-adapted mammalian rods. We contend that this higher-than-expected level of opsin may have implications in rod cell dark noise.

## SUPPORTING MATERIAL

Supporting Material and Methods, one figure, and two tables are available at [http://www.biophysj.org/biophysj/supplemental/S0006-3495\(16\)34280-1](http://www.biophysj.org/biophysj/supplemental/S0006-3495(16)34280-1).

## AUTHOR CONTRIBUTIONS

H.T., T.P.S., and T.H. designed the study, analyzed the results, and wrote the manuscript. H.T. and T.H. conducted the experiments.



## ACKNOWLEDGMENT

We thank Prof. King-Wai Yau for discussions of this work.

We acknowledge the generous support from the Crowley Family Fund and the Danica Foundation. This work has also been generously supported by an International Research Alliance with Professor Thue W. Schwartz at The Novo Nordisk Foundation Center for Basic Metabolic Research (<http://www.metabol.ku.dk>) through an unconditional grant from the Novo Nordisk Foundation to University of Copenhagen. We also acknowledge the support from NIH R01 EY012049 (T.P.S. and T.H.), as well as the Tri-Institutional Training Program in Chemical Biology in supporting H.T.

## REFERENCES

- Menon, S. T., M. Han, and T. P. Sakmar. 2001. Rhodopsin: structural basis of molecular physiology. *Physiol. Rev.* 81:1659–1688.
- Farrens, D. L., and H. G. Khorana. 1995. Structure and function in rhodopsin: measurement of the rate of metarhodopsin II decay by fluorescence spectroscopy. *J. Biol. Chem.* 270:5073–5076.
- Kefalov, V. J., M. E. Estevez, ..., K. W. Yau. 2005. Breaking the covalent bond—a pigment property that contributes to desensitization in cones. *Neuron.* 46:879–890.
- Baylor, D. A., G. Matthews, and K. W. Yau. 1980. Two components of electrical dark noise in toad retinal rod outer segments. *J. Physiol.* 309:591–621.
- Baylor, D. A., B. J. Nunn, and J. L. Schnapf. 1984. The photocurrent, noise and spectral sensitivity of rods of the monkey *Macaca-Fascicularis*. *J. Physiol.* 357:575–607.
- Luo, D. G., T. Xue, and K. W. Yau. 2008. How vision begins: an odyssey. *Proc. Natl. Acad. Sci. USA.* 105:9855–9862.
- Defoe, D. M., and D. Bok. 1983. Rhodopsin chromophore exchanges among opsin molecules in the dark. *Invest. Ophthalmol. Vis. Sci.* 24:1211–1226.
- Janz, J. M., and D. L. Farrens. 2004. Role of the retinal hydrogen bond network in rhodopsin Schiff base stability and hydrolysis. *J. Biol. Chem.* 279:55886–55894.
- Guo, Y., S. Sekharan, ..., E. C. Yan. 2014. Unusual kinetics of thermal decay of dim-light photoreceptors in vertebrate vision. *Proc. Natl. Acad. Sci. USA.* 111:10438–10443.
- Hubbard, R. 1958. The thermal stability of rhodopsin and opsin. *J. Gen. Physiol.* 42:259–280.
- Palczewski, K., T. Kumasaka, ..., M. Miyano. 2000. Crystal structure of rhodopsin: a G protein-coupled receptor. *Science.* 289:739–745.
- Park, J. H., P. Scheerer, ..., O. P. Ernst. 2008. Crystal structure of the ligand-free G-protein-coupled receptor opsin. *Nature.* 454:183–187.
- Degrip, W. J. 1982. Thermal stability of rhodopsin and opsin in some novel detergents. *Methods Enzymol.* 81:256–265.
- Hubbard, R., and G. Wald. 1952. *Cis-trans* isomers of vitamin A and retinene in the rhodopsin system. *J. Gen. Physiol.* 36:269–315.
- Okada, T., M. Sugihara, ..., V. Buss. 2004. The retinal conformation and its environment in rhodopsin in light of a new 2.2 Å crystal structure. *J. Mol. Biol.* 342:571–583.
- Nakamichi, H., V. Buss, and T. Okada. 2007. Photoisomerization mechanism of rhodopsin and 9-*cis*-rhodopsin revealed by X-ray crystallography. *Biophys. J.* 92:L106–L108.
- Banerjee, S., T. Huber, and T. P. Sakmar. 2008. Rapid incorporation of functional rhodopsin into nanoscale apolipoprotein bound bilayer (NABB) particles. *J. Mol. Biol.* 377:1067–1081.
- Durr, U. H., M. Gildenberg, and A. Ramamoorthy. 2012. The magic of bicelles lights up membrane protein structure. *Chem. Rev.* 112:6054–6074.
- Tian, H., S. Naganathan, ..., T. Huber. 2014. Bioorthogonal fluorescent labeling of functional G protein-coupled receptors. *ChemBioChem.* 15:1820–1829.
- Anderson, R. E., and M. B. Maude. 1970. Phospholipids of bovine rod outer segments. *Biochemistry.* 9:3624–3628.
- Matsumoto, H., F. Tokunaga, and T. Yoshizawa. 1975. Accessibility of the iodopsin chromophore. *Biochim. Biophys. Acta.* 404:300–308.
- Crescitelli, F. 1988. The gecko visual pigment: the chromophore dark exchange reaction. *Exp. Eye Res.* 46:239–248.
- Shichida, Y., T. Kato, ..., T. Yoshizawa. 1990. Effects of chloride on chicken iodopsin and the chromophore transfer reactions from iodopsin to scotopsin and B-photopsin. *Biochemistry.* 29:5843–5848.
- Corley, S. C., P. Sprangers, and A. D. Albert. 2011. The bilayer enhances rhodopsin kinetic stability in bovine rod outer segment disk membranes. *Biophys. J.* 100:2946–2954.
- Lamb, T. D., and E. N. Pugh, Jr. 2004. Dark adaptation and the retinoid cycle of vision. *Prog. Retin. Eye Res.* 23:307–380.
- Nickell, S., P. S. Park, ..., K. Palczewski. 2007. Three-dimensional architecture of murine rod outer segments determined by cryoelectron tomography. *J. Cell Biol.* 177:917–925.
- Barlow, R. B., R. R. Birge, ..., J. R. Tallent. 1993. On the molecular origin of photoreceptor noise. *Nature.* 366:64–66.
- Hubbard, R. 1966. The stereoisomerization of 11-*cis*-retinal. *J. Biol. Chem.* 241:1814–1818.
- Rieke, F., and D. A. Baylor. 1996. Molecular origin of continuous dark noise in rod photoreceptors. *Biophys. J.* 71:2553–2572.
- Field, G. D., A. P. Sampath, and F. Rieke. 2005. Retinal processing near absolute threshold: from behavior to mechanism. *Annu. Rev. Physiol.* 67:491–514.
- Cornwall, M. C., and G. L. Fain. 1994. Bleached pigment activates transduction in isolated rods of the salamander retina. *J. Physiol.* 480:261–279.
- Melia, T. J., C. W. Cowan, ..., T. G. Wensel. 1997. A comparison of the efficiency of G protein activation by ligand-free and light-activated forms of rhodopsin. *Biophys. J.* 73:3182–3191.
- Fu, Y., V. Kefalov, ..., K. W. Yau. 2008. Quantal noise from human rod cone pigment. *Nat. Neurosci.* 11:565–571.
- Kono, M., P. W. Goletz, and R. K. Crouch. 2008. 11-*cis*- and all-*trans*-retinols can activate rod opsin: rational design of the visual cycle. *Biochemistry.* 47:7567–7571.
- Jager, S., K. Palczewski, and K. P. Hofmann. 1996. Opsin/all-*trans*-retinal complex activates transducin by different mechanisms than photolyzed rhodopsin. *Biochemistry.* 35:2901–2908.
- Han, M., and T. P. Sakmar. 2000. Assays for activation of recombinant expressed opsins by all-*trans*-retinals. *Methods Enzymol.* 315:251–267.
- Kefalov, V. J., R. K. Crouch, and M. C. Cornwall. 2001. Role of non-covalent binding of 11-*cis*-retinal to opsin in dark adaptation of rod and cone photoreceptors. *Neuron.* 29:749–755.
- Deupi, X., and B. K. Kobilka. 2010. Energy landscapes as a tool to integrate GPCR structure, dynamics, and function. *Physiology (Bethesda).* 25:293–303.
- Saari, J. C., G. G. Garwin, ..., K. Palczewski. 1998. Reduction of all-*trans*-retinal limits regeneration of visual pigment in mice. *Vision Res.* 38:1325–1333.

**Biophysical Journal, Volume 112**

**Supplemental Information**

**Measurement of Slow Spontaneous Release of 11-*cis*-Retinal from  
Rhodopsin**

**He Tian, Thomas P. Sakmar, and Thomas Huber**

## SUPPLEMENTAL EXPERIMENTAL PROCEDURES (Tian *et al.*)

### Preparation of the POPC/CHAPS bicelles buffer

The POPC lipids were dissolved in 20% (w/v) CHAPS solution at 1:1 POPC-to-CHAPS ratio (w/w) using repeated freeze-thaw cycles, and diluted with water to make a 10% (w/v) stock bicelle solution. Note that the concentration of amphiphiles (POPC and CHAPS) is twice that value of the percentage. For example, 10% POPC/CHAPS contain 100 mg/mL POPC and 100 mg/mL CHAPS. The solution was frozen in liquid nitrogen, then thawed and vortexed repeatedly to facilitate the dissolving of POPC. The 10% stock solution was aliquoted, kept at  $-20^{\circ}\text{C}$  and thawed prior to use. For the retinal binding assay and chromophore exchange experiment, Buffer A (1% (w/v) POPC/CHAPS in 25 mM MES, 25 mM HEPES potassium salt, pH 6.7, 125 mM KCl) or Buffer B (1% (w/v) POPC/CHAPS in 25 mM MES, 25 mM HEPES hemisodium salt, pH 6.0, 137.5 mM NaCl, 0.25 mM EDTA) was prepared freshly by diluting 10% POPC/CHAPS stock solution with the corresponding concentrated buffer stocks.

### Immunoaffinity Purification of ROS Rho for Trp-based FRET assay

Because Rho is light-sensitive, all the steps described below were performed in a dark room under dim red light, unless stated otherwise.

Native rod outer segment (ROS) membranes were isolated under dim red light from frozen bovine retinas (W. L. Lawson Co., Lincoln, NE) by gentle homogenization, differential centrifugation and density gradient centrifugation as described (Botelho *et al.*, 2002; Papermaster and Dreyer, 1974). The concentration of Rho in the ROS membrane preparations ranged from 140 to 180  $\mu\text{M}$ . The aliquots of the ROS membranes were stored at  $-80^{\circ}\text{C}$ .

Bovine ROS were lysed with the solubilization buffer (1% (w/v) DM, 50 mM HEPES or Tris-HCl, pH 6.8, 100 mM NaCl, 1 mM  $\text{CaCl}_2$  with Complete EDTA-free Protease Inhibitor Cocktail, Roche) for at least 1 hour at  $4^{\circ}\text{C}$ . To lyse cells, 1 mL of solubilization buffer was used for  $10^7$  cells. To lyse ROS membranes, the volume of solubilization buffer was not critical, as long as the final solubilization buffer contains 1% DM for rhodopsin concentrations up to 1 mg/mL. The lysate was cleared by centrifugation at 100,000-g for 30 min. The 1D4 resin was prepared as described before (Knepp *et al.*, 2011; Oprian *et al.*, 1987). The supernatant fraction was mixed with 1D4-Sepharose-2B resin (binding capacity by UV-Vis: 600  $\mu\text{g}$  Rho/mL resin) and incubated overnight at  $4^{\circ}\text{C}$ . The resin was transferred in a centrifugal filter unit with a 0.45- $\mu\text{m}$  microporous hydrophilic PVDF membrane (Ultrafree-CL; Millipore), which enabled efficient removal of buffer. For Trp fluorescence assay, the resin was first washed with Wash Buffer (DPBS containing 0.1% (w/v) DM) for three times (30 minutes incubation each time), and then with a low-salt buffer (0.1% (w/v) DM in 2 mM phosphate buffer, pH 6.0). The receptor was eluted with low-salt elution buffer (0.1% (w/v) DM and 0.33 mg/mL nonapeptide (sequence TETSQVAPA) in 2 mM phosphate buffer, pH 6.0, equal volume of the packed resin, incubated on ice for at least 1 hour). The purified receptor was collected in a clean 1.5-mL Eppendorf tube. Then 150 mM salt was supplemented into the sample to restore the ionic strength. This low-salt buffer serves to preferably elute from the resin the retinal-bound Rho, compared with the misfolded opsin (Ridge *et al.*, 1995). In our experience, the fraction of misfolded receptor in the ROS membranes was negligible, and the low-salt buffer and saline buffer made little difference in the quality of the eluted sample. However, for Rho heterogeneously expressed in the HEK293F cells, the low-salt buffer improved the fraction of correctly folded, retinal-bound Rho. The unique property of Sepharose 2B resin results in strong compression of the resin bed during centrifugation filtration. The compressed resin restores its original volume upon “rehydration” with buffer. In this way the volume of Elution Buffer can be minimized to increase the concentration of receptor in the elution.

### Lectin affinity purification of ROS Rho for chromophore exchange experiment

The immunopurified Rho samples contains the nonapeptide, which would interfere with a second purification step after the chromophore exchange. Therefore, concanavalin A (ConA) bound to a gel matrix was alternately employed to purify Rho from ROS membranes (Degrip, 1982; Litman, 1982). Briefly, an aliquot of ROS membranes (0.75 mL,  $\sim 4$  mg Rho) was solubilized using a solubilization buffer (7.5 mL; 13

mg/mL CHAPS, 1 mg/mL POPC, 137.5 mM NaCl, 25 mM MES, 25 mM hemi sodium HEPES, 0.25 mM disodium EDTA, 1 mM MnCl<sub>2</sub> and 1 mM CaCl<sub>2</sub>, pH 6.0). The mixture was gently agitated for 1 hour at 4°C. The insoluble material was removed by centrifugation for 30 minutes at 100,000×g in a desktop ultracentrifuge (Beckman Optima Max). The supernatant was incubated at 4°C for 3 hours under gentle agitation with concanavalin A-sepharose conjugate affinity matrix (1.7 mL packed volume, Sigma). The concanavalin molecules of the affinity matrix were cross-linked by glutaraldehyde treatment to reduce leakage (Degrip, 1982). The resin was washed with Buffer OG (12.5 mL; 15 mg/mL *n*-octyl- $\beta$ -D-glucoside, 137.5 mM NaCl, 25 mM MES, 25 mM hemi sodium HEPES, 0.25 mM disodium EDTA, pH 6.0; 4 times, 20 minutes each time) and separated from the wash buffer using a clinical centrifuge. The resin was transferred into a microporous centrifugal filter unit (Amicon Ultrafree-CL) to remove the Buffer OG. Rho was eluted with Buffer OG supplemented with 100 mM  $\alpha$ -methyl-D-mannoside (1 mL  $\times$  3). The combined elution was concentrated at room temperature for about 10 min at 2,200×g to a volume of approximately 200  $\mu$ L using a 30-kDa Amicon Ultra-4 centrifugal ultrafiltration device with a regenerated cellulose membrane (Millipore). The concentrated sample was applied to a small Sephadex G-50 column (5 cm  $\times$  0.7 cm) equilibrated the POPC/CHAPS bicelle Buffer B. The sample was eluted with the POPC/CHAPS bicelle Buffer B (200  $\mu$ L  $\times$  5). The main Rho-containing fractions were identified by UV-Vis spectroscopy, pooled and diluted with the POPC/CHAPS bicelle Buffer B to 10 mL.

### **The detailed procedures of chromophore exchange in ROS Rho**

Retinoid solution in benzene (approximately 0.3 mL, 30 mM) was transferred to nitric acid washed 4-mL glass vials. The solvent was evaporated under a stream of argon under red light. The sample was kept at high vacuum for 15 minutes. Then the retinoids were dissolved in pure ethanol (0.5 mL). The stock solution was diluted to about 2 mM. Lectin-affinity purified ROS Rho was diluted with the 1% POPC/CHAPS bicelle Buffer B to give a total volume of 6.74 mL (0.21 mg/mL, 5.2  $\mu$ M). The sample was divided into five equal volumes and supplemented with the following: A) ethanol, B) 11CR, C) 9CR, D) ATR, and E) 50 mM NH<sub>2</sub>OH. The final concentrations of retinoids were 49  $\mu$ M. The samples were kept in 200- $\mu$ L PCR tubes inside 1.5-mL brown micro centrifuge tubes. Each set of 5 tubes was put into large UZ tubes, wrapped in aluminum foil, and incubated in a water bath. To overcome buoyancy, large steel rods were added into the UZ tubes as weights. Each combination of Rho and retinoids were incubated under seven different conditions: 1) 28°C for 11.6 days (10<sup>6</sup> s), 2) 36°C for 11.6 days, 3) 44°C for 11.6 days, 4) 28°C for 2 $\times$ 11.6 days (2 $\times$ 10<sup>6</sup> s), 5) 36°C for 2 $\times$ 11.6 days, 6) 44°C for 2 $\times$ 11.6 days, 7) 28°C for 3 $\times$ 11.6 days (3 $\times$ 10<sup>6</sup> s). The samples were denoted as A1, A2, ...A7, B1,... E6, E7. At the end of incubation, the samples were checked for their volume, and no loss was observed. The samples were then purified using 1D4-sepharose resin (100  $\mu$ L each). In a centrifugal filter, the resin was washed with Wash Buffer (25 mM HEPES, adjusted with NaOH to pH 7.0, 150 mM NaCl 0.75% CHAPS, 0.1% POPC; 400  $\mu$ L  $\times$  5). The mixture of Rho and isoRho was eluted with Elution Buffer (Wash Buffer + 0.33 mg/mL nonapeptide) and characterized by dark–light UV-Vis difference spectroscopy in presence of 50 mM hydroxylamine. For Rho incubated with ethanol, 11CR, and ATR, no spectral change was observed, and the receptor was completely recovered from the samples incubated at 28 and 36°C. Rho incubated with NH<sub>2</sub>OH was irreversibly denatured due to the hydrolysis of Schiff base bond followed by thermal denaturation of opsin.

During the unusually long reaction time of the chromophore exchange experiment, opsin denaturation could compete with 9CR binding, resulting in underestimation for the exchange kinetics, particularly at high temperatures. Therefore, we performed a correction for the effect of opsin denaturation. We assume that retinal dissociation was the rate-limiting step, and the resulting opsin either followed the thermal denaturation pathway, or recombined with 9CR. The amount of the denatured opsin could be quantified by UV-Vis spectroscopy. At 44°C, the recovery of isoRho and Rho was 80.4% for 1 $\times$ 10<sup>6</sup> s and 45.6% for 2 $\times$ 10<sup>6</sup> s. For samples incubated at 28 and 36 °C the recovery was ~100% for up to 3 $\times$ 10<sup>6</sup> s incubation.



Let the total recovery of receptor be  $a$

$$a = \frac{[\text{isoRho, recovered}] + [\text{Rho, recovered}]}{[\text{Rho, initial}]} \quad \text{Eq.(1)}$$

And the fraction of isoRho be  $b$ :

$$b = \frac{[\text{isoRho, recovered}]}{[\text{isoRho, recovered}] + [\text{Rho, recovered}]} \quad \text{Eq.(2)}$$

The fraction of retinal dissociation is  $(1-a+ab)$  (Table S3).

The rate constant was obtained by fitting the fraction of retinal dissociation with a mono-exponential model.

Table S1. The fraction of retinal dissociation and the dissociation rate constant ( $k_{off}$ )

|                                   | Temperature (°C)  |                 |                     |                   |
|-----------------------------------|-------------------|-----------------|---------------------|-------------------|
|                                   | 28                | 36              | 44<br>(uncorrected) | 44<br>(corrected) |
| $t = 1 \times 10^6$ s             | 0.0345            | 0.125           | 0.475               | 0.578             |
| $t = 2 \times 10^6$ s             | 0.0708            | 0.225           | 0.658               | 0.844             |
| $t = 3 \times 10^6$ s             | 0.0880            | n.d.            | n.d.                | n.d.              |
| $k_{off}(10^{-7} \text{ s}^{-1})$ | $0.328 \pm 0.016$ | $1.29 \pm 0.02$ | $5.82 \pm 0.38$     | $8.89 \pm 0.22$   |

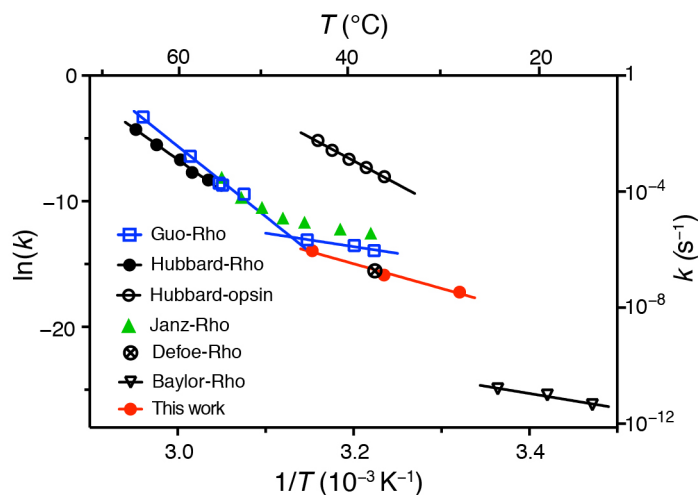

Figure S1. Comparison of the Arrhenius plots for the thermal decay rates of Rho or opsin. The Eyring analyses of the same sets of data are shown in the main text, Figure 5. *Empty blue square*: the thermal decay of Rho in 0.1% DM (Guo et al., 2014). *Solid black circle*: Rho in 2% digitonin (Hubbard, 1958) *Empty black circle*: opsin in 2% digitonin (Hubbard, 1958). *Solid green triangle*: Rho in 0.05% DM (Janz and Farrens, 2004). *Crossed empty circle*: chromophore exchange of Rho in mouse retina measured by radioactive tracers *in vivo* (Defoe and Bok, 1983). *Inverted empty triangle*: spontaneous isomerization and activation of Rho in toad retina measured electrophysiological recording (Baylor et al., 1980). *Red solid circle*: Rho chromophore release and exchange with 9CR in 1% POPC/CHAPS bicelles in the present study.

Table S2. The thermodynamic parameters derived from the Eyring plots in Figure 5 <sup>a</sup>

| Source of data                                               | Guo, Rho       |                | Hubbard, Rho   | Hubbard, opsin | Baylor, Rho    | This work, Rho |
|--------------------------------------------------------------|----------------|----------------|----------------|----------------|----------------|----------------|
| Temperature (°C)                                             | 52.0 ~<br>64.6 | 37.1 ~<br>44.6 | 56.4 ~<br>65.6 | 35.9 ~<br>43.3 | 14.9 ~<br>24.1 | 28.0 ~<br>44.0 |
| $\Delta^\ddagger H$ (kcal mol <sup>-1</sup> )                | 110 ± 7        | 20.6 ± 4.5     | 98.2 ± 4.7     | 73.7 ± 3.0     | 23.0 ± 3.8     | 38.5 ± 4.4     |
| $\Delta^\ddagger S$ (cal mol <sup>-1</sup> K <sup>-1</sup> ) | 261 ± 15       | -20 ± 9        | 222 ± 9        | 164 ± 6        | -19 ± 7        | 35 ± 9         |

<sup>a</sup> We did not include the thermal decay data by Janz & Farrens in Table S2, because their results exhibited a concave Eyring plot. Therefore, the linear fitting assuming a single activation barrier would be unsuitable. There were too few data points for the high temperature regime to fit a two-process model with separate sets of thermodynamic parameters for the high- and low-temperature regimes, respectively.

## SUPPLEMENTAL REFERENCES

Baylor, D.A., Matthews, G., and Yau, K.W. (1980). Two components of electrical dark noise in toad retinal rod outer segments. *J. Physiol.* *309*, 591-621.

Botelho, A.V., Gibson, N.J., Thurmond, R.L., Wang, Y., and Brown, M.F. (2002). Conformational energetics of rhodopsin modulated by nonlamellar-forming lipids. *Biochemistry* *41*, 6354-6368.

Defoe, D.M., and Bok, D. (1983). Rhodopsin chromophore exchanges among opsin molecules in the dark. *Invest. Ophthalmol. Vis. Sci.* *24*, 1211-1226.

Degrip, W.J. (1982). Thermal stability of rhodopsin and opsin in some novel detergents. *Method Enzymol.* *81*, 256-265.

Guo, Y., Sekharan, S., Liu, J., Batista, V.S., Tully, J.C., and Yan, E.C. (2014). Unusual kinetics of thermal decay of dim-light photoreceptors in vertebrate vision. *Proc. Natl. Acad. Sci. USA* *111*, 10438-10443.

Hubbard, R. (1958). The thermal stability of rhodopsin and opsin. *J. Gen. Physiol.* *42*, 259-280.

Janz, J.M., and Farrens, D.L. (2004). Role of the retinal hydrogen bond network in rhodopsin Schiff base stability and hydrolysis. *J. Biol. Chem.* *279*, 55886-55894.

Knepp, A.M., Grunbeck, A., Banerjee, S., Sakmar, T.P., and Huber, T. (2011). Direct measurement of thermal stability of expressed CCR5 and stabilization by small molecule ligands. *Biochemistry* *50*, 502-511.

Litman, B.J. (1982). Purification of rhodopsin by concanavalin A affinity chromatography. *Method Enzymol.* *81*, 150-153.

Oprian, D.D., Molday, R.S., Kaufman, R.J., and Khorana, H.G. (1987). Expression of a synthetic bovine rhodopsin gene in monkey kidney cells. *Proc. Natl. Acad. Sci. USA* *84*, 8874-8878.

Papermaster, D.S., and Dreyer, W.J. (1974). Rhodopsin content in the outer segment membranes of bovine and frog retinal rods. *Biochemistry* *13*, 2438-2444.

Ridge, K.D., Lu, Z., Liu, X., and Khorana, H.G. (1995). Structure and function in rhodopsin. Separation and characterization of the correctly folded and misfolded opsins produced on expression of an opsin mutant gene containing only the native intradiscal cysteine codons. *Biochemistry* *34*, 3261-3267.
